# Supplementary material for: Synthesis, characterization, and application of a biocompatible gene delivery nanocarrier constructed from gold nanostars and a chitosan–cyclodextrin–poly(ethylene imine) graft polymer
Source: Royal Society of Chemistry journal article supplement (doi:10.1039/d4ma00433g), 2024-01-01
Supplement: d4ma00433g1.pdf [file d4ma00433g1.pdf]

## Supplementary information

### **Synthesis, characterization, and application of a biocompatible gene delivery nanocarrier constructed from gold nanostars and chitosan-cyclodextrin-poly(ethylene imine) graft polymer**

Farbod Tabesh<sup>a, b</sup>, Golnaz Haghverdi<sup>a, b</sup>, Kireeti Phani Devarakonda<sup>a, b</sup>, Tarik F Massoud<sup>a, b</sup> and Ramasamy Paulmurugan<sup>a, b,\*</sup>

<sup>a</sup> Molecular Imaging Program at Stanford (MIPS), Department of Radiology, Stanford University School of Medicine, Stanford, CA, USA.

<sup>b</sup> Canary Center for Cancer Early Detection, Department of Radiology, Stanford University School of Medicine, Palo Alto, CA, USA.

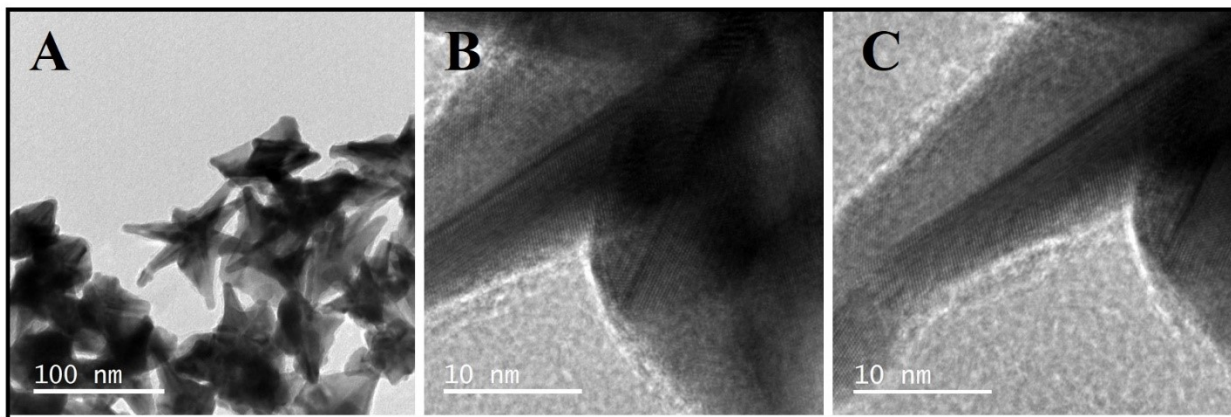

**Fig. S1.** TEM images of AuNSs with different magnifications (A-C).

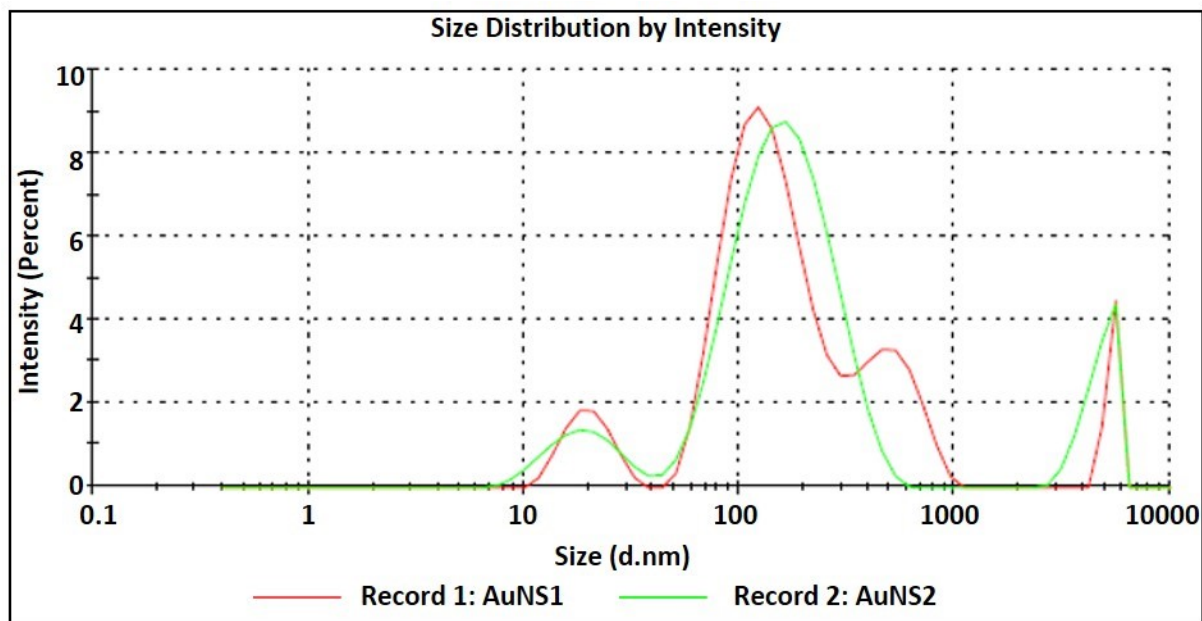

**Fig. S2.** Size distribution of AuNS measured by DLS device.

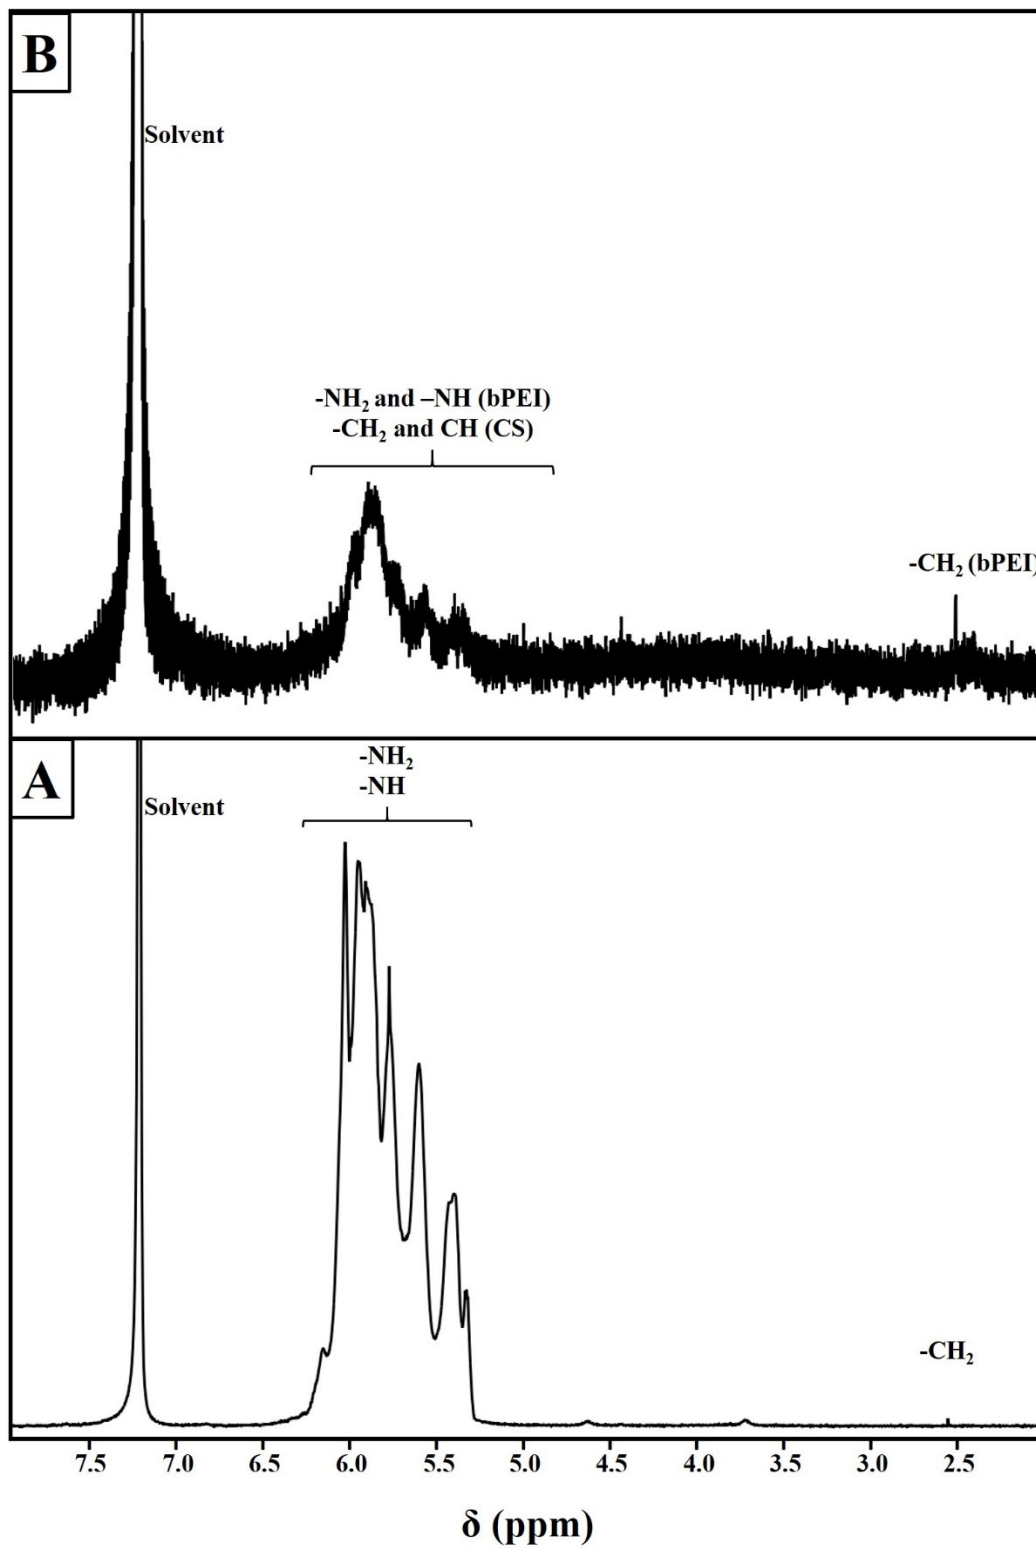

**Fig. S3.**  $^1\text{H}$  NMR spectra of bPEI (A) and AuNS@CCP (B).

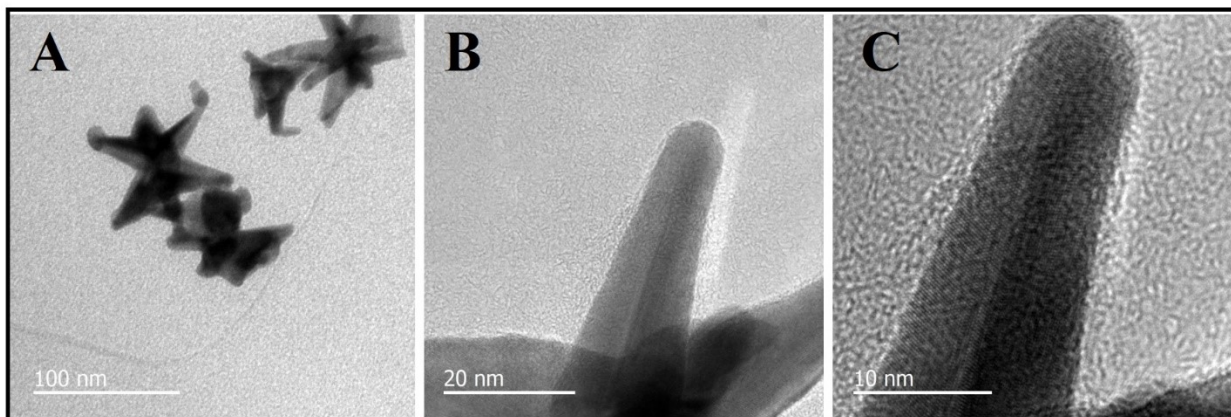

Fig. S4. TEM images of AuNS@CCP with different magnifications (A-C).

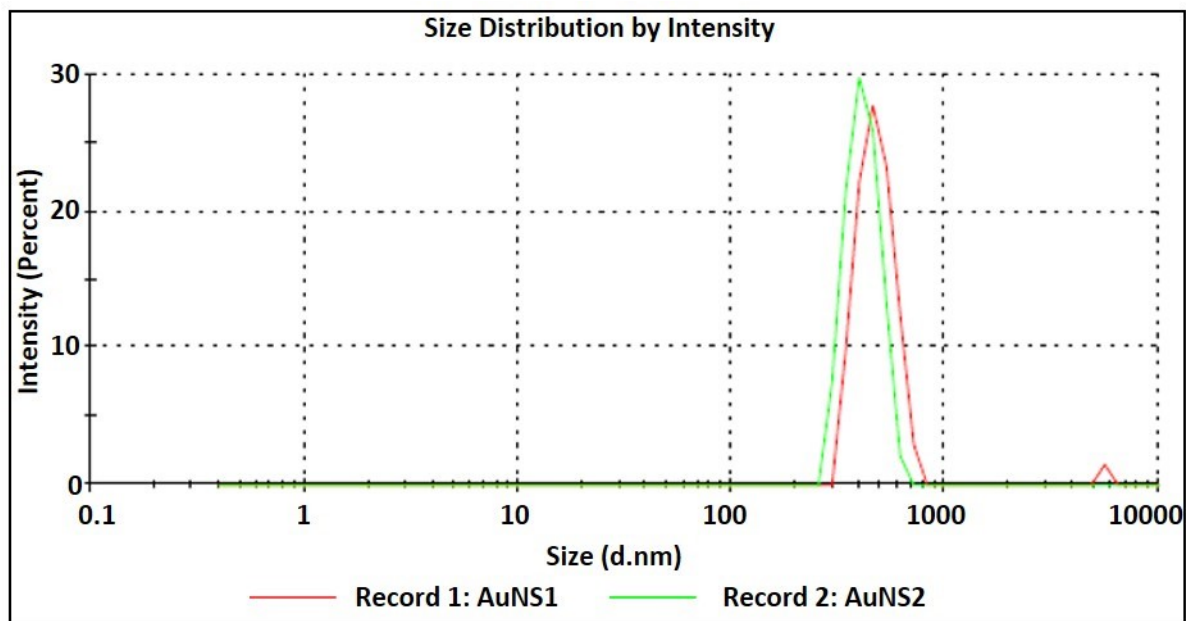

Fig. S5. Size distribution of AuNS@CCP measured by DLS device.

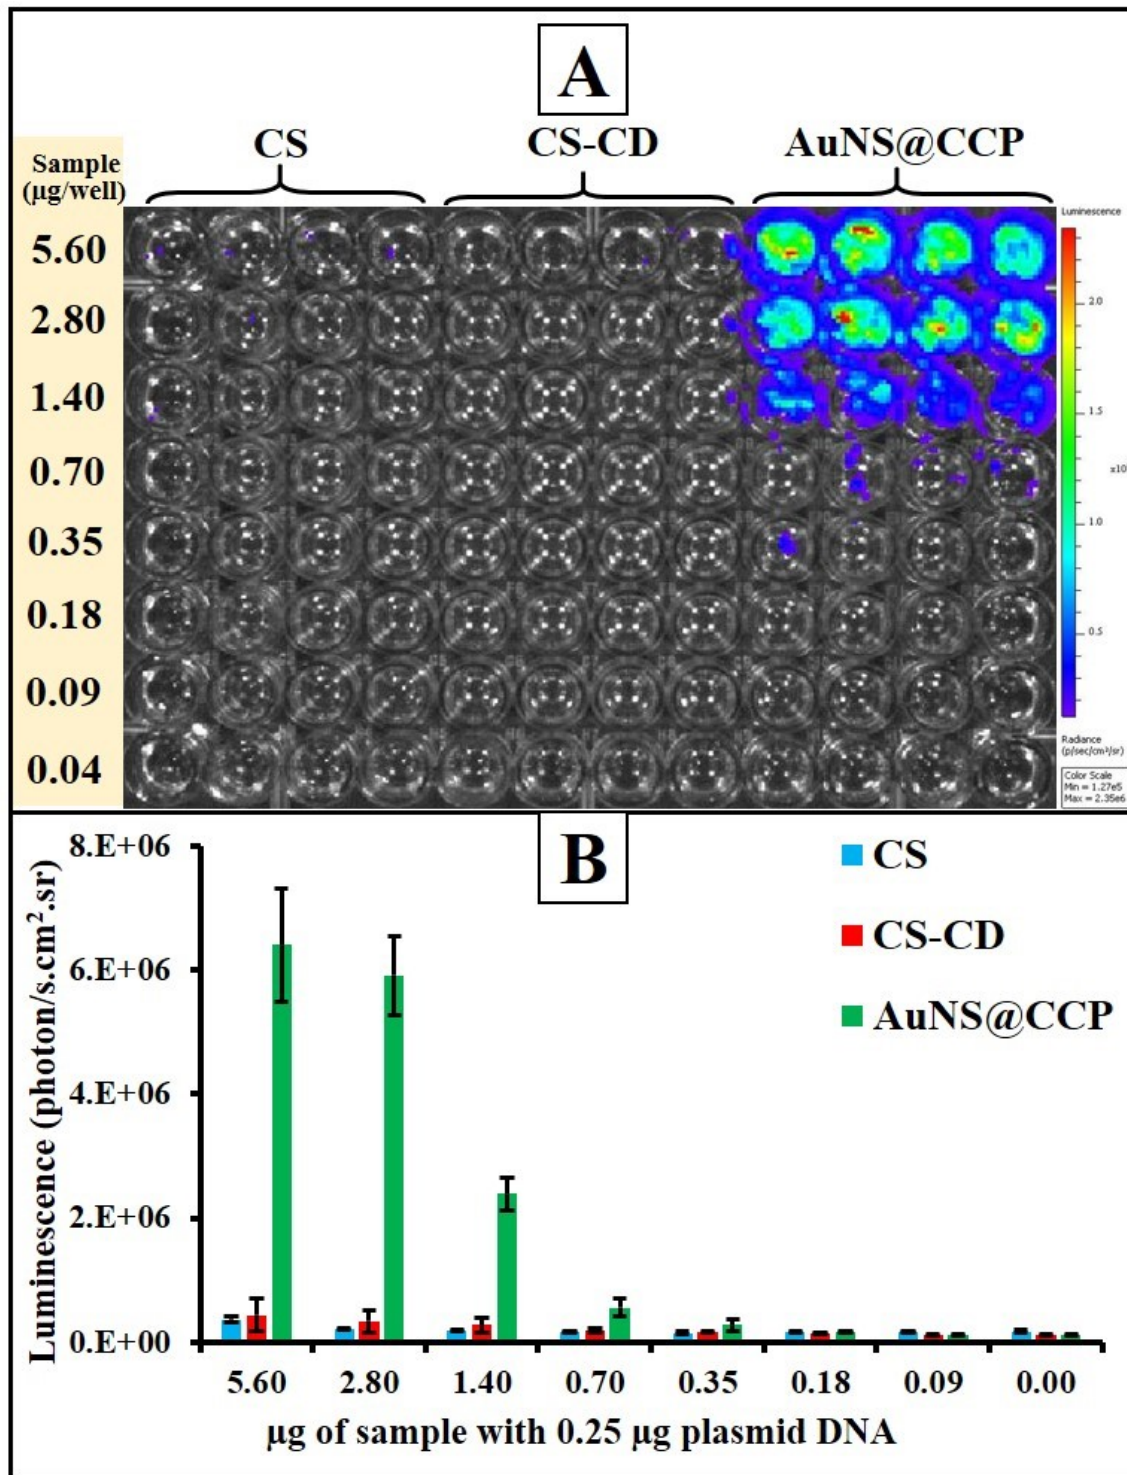

**Fig. S6.** Bioluminescence image (A) and the quantitative graph showing the outcome of pcDNA-FLuc-ZsGreen plasmid DNA transfected in HEK293T cells at different N/P ratios using CS, CS-CD, bPEI, and AuNS@CCP (B).

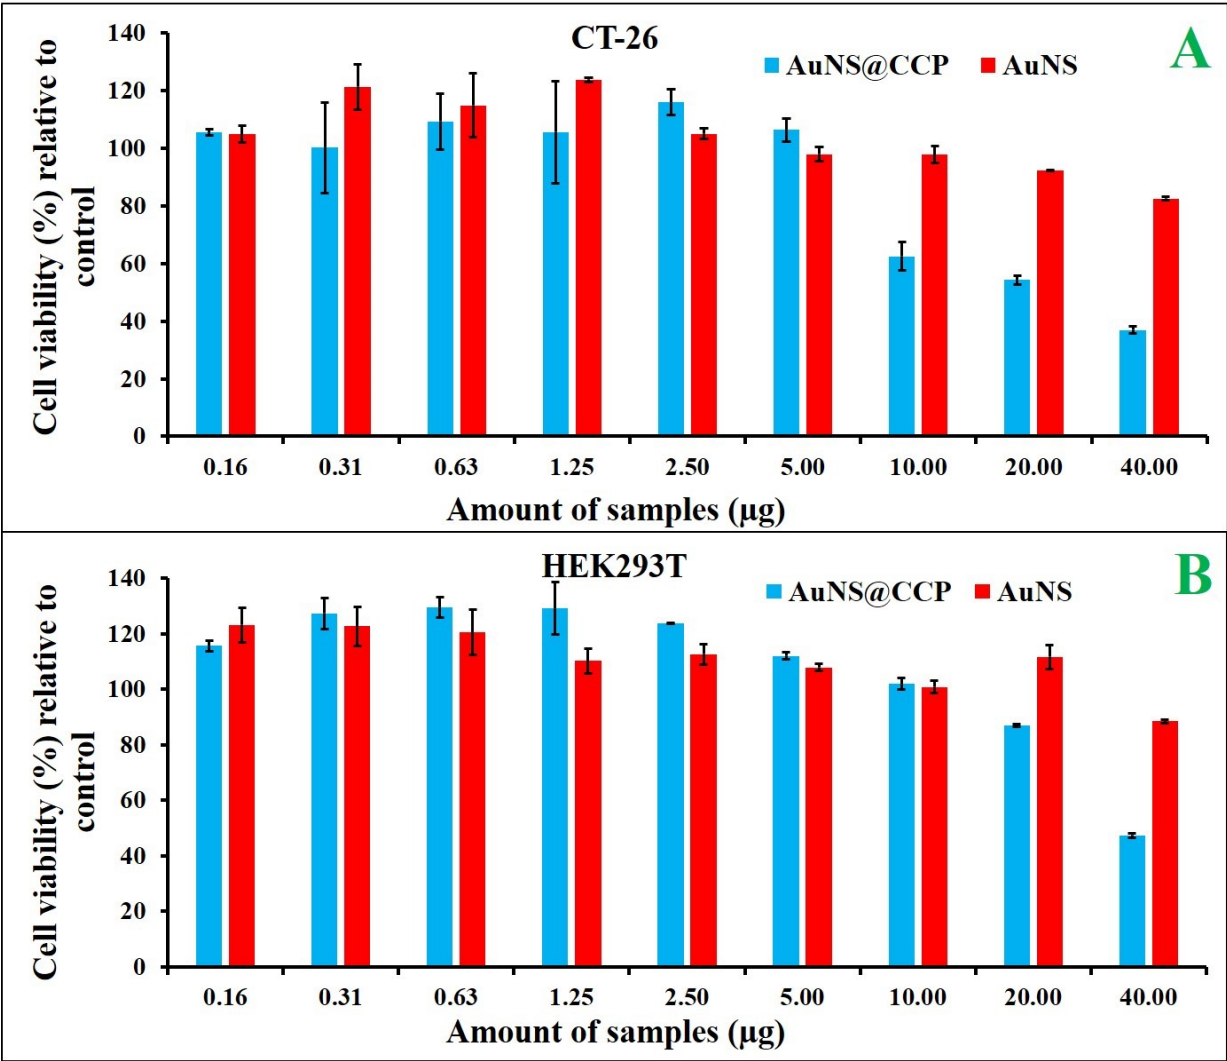

**Fig. S7.** Investigation of cytotoxicity of pure AuNS and AuNS@CCP (without plasmid DNA) on (A) CT-26 and (B) HEK293T cells (Error bars are expressed as Standard Error Mean)
